# Supplementary material for: An Efficient 2D Protocol for Differentiation of iPSCs into Mature Postmitotic Dopaminergic Neurons: Application for Modeling Parkinson’s Disease
Source: MDPI journal article supplement (doi:10.3390/ijms24087297), 2023-04-14
Supplement: s1 [file s1]

Table S1. The proportion of cells in G1, S, and G2 phases of the cell cycle in mature neuron population.

|    | IPSRG2L (n=5) | IPSPDL2.15L (n=3) | IPSPDP1.5L (n=5) |
|----|---------------|-------------------|------------------|
| G1 | 83,7 ± 3,4    | 88,06333 ± 7,9    | 91,218 ± 2,7     |
| S  | 13,9 ± 3,7    | 9,743333 ± 6,8    | 7,068 ± 1,4      |
| G2 | 2,242 ± 1,3   | 1,703333 ± 1,7    | 0,694 ± 0,8      |

Data shown as mean ± SEM.
